# 1 **Microbial Diversity on Ancestral Halls with Different Visitor Flow Rates Using** 2 **Amplicon Sequencing**

3 Manchun Liu<sup>1,†</sup>, Xining Su<sup>1,†</sup>, Qinqing Wen<sup>1</sup>, Tongshu Yang<sup>1</sup>, Muyuyang Lin<sup>1</sup>, Paierzhati  
4 Abudureyimu<sup>1</sup>, Jerome Rumdon Lon<sup>12\*</sup>, and Jianfei Luo<sup>1</sup>

5 <sup>1</sup>School of Biology and Biological Engineering, South China University of Technology, Guangzhou,  
6 China

7 <sup>2</sup>Institute of Synthetic Biology, Shenzhen Institute of Advanced Technology, Shenzhen, China

8  
9 †Equal Contribution

10 \*Corresponding Author and e-mail: Jeromerumdon@aliyun.com

11 Ma.L., 0000-0001-8870-7745; X.S., 0000-0001-8012-5281; J.R.L., 0000-0003-4714-6931; J.L.,  
12 0000-0002-9570-4224

13  
14 **Keywords:** wooden ancestral hall, biodeterioration, amplicon sequencing, biocides

## 15 **Abstract**

16 Wooden buildings are facing biodeterioration because of the natural weathering. Ancestral halls are  
17 traditional Chinese wooden architecture with high artistic value. The research analyzed the microbial  
18 diversity of nine ancestral halls with different visitor flow rates in Guangdong Province under  
19 subtropical monsoon climates. With amplicon sequencing and conventional culturing methods, a  
20 common core harmful microorganism group which are proven to be capable of degrading cellulose and  
21 lignin was found, and some of them originated from human activities, including *Bacillus*,  
22 *Pseudomonas*, *Paenibacillus*, *Acinetobacter*, *Toxicocladosporium*, *Cladosporium*, *Aspergillus*, and  
23 *Epicoccum*, allowing us to apply unified antimicrobial methods to different ancestral halls in  
24 Guangdong Province. Additionally, the microbial community is similar between damaged and  
25 undamaged points, predicting the potential risk of taking paint coating as the only method for  
26 antimicrobial preservation. Hence, we evaluated the effect of four representative biocides and  
27 determined the feasibility of low-concentration Isothiazolinone. This research adds significant  
28 reference for the protection of wooden buildings.

## 29 **Key points**

30 *A common core harmful microorganism group was discovered on the ancestral halls.*

31 *Some of the harmful microorganisms are relative to the human activities.*

32 *Only taking paint coating for antimicrobial preservation has potential risk.*

## 33 **Introduction**

34 Wooden architecture under open-air conditions is a common habitat for many microorganisms,  
35 including bacteria and fungi, due to its porous structure and organic components(Cennamo et al. 2018;  
36 De Windt et al. 2014). The colonization by microorganisms of the wood surface results in forming of a  
37 biofilm, an extracellular polysaccharide matrix consisting of cell debris and cell excretions such as

38 proteins, polysaccharides, and lipids. As the biofilms provide a protective microenvironment for  
39 microorganisms, allowing more of them to grow and reproduce on the surface, the wooden architecture  
40 faces further biodeterioration(Coelho et al. 2021; Li et al. 2022; Negi and Sarethy 2019; Skipper et al.  
41 2022). Meanwhile, the pigments produced by the microorganisms and the various colors of microbial  
42 communities cover the surface of wooden cultural relics, leading to severe aesthetic damage(Kim et al.  
43 2020; Sterflinger and Pinar 2013). What's more, studies show that cellulolytic microorganisms such as  
44 *Bacillus*, *Aspergillus*, *Cladosporium*, and *Penicillium* are capable of destroying Polychrome wood  
45 artifacts(Cennamo et al. 2018). Enzymes such as cellulase, hemicellulase, and laccase produced during  
46 the metabolism can degrade cellulose and lignin and destroy the main structure of wooden cultural  
47 relics(Huang et al. 2021; Zhang et al. 2021).

48  
49 Currently, the surface of the wooden ancestral halls is often covered with a coating of paint for longer  
50 preservation, which could reduce microbial growth(Gobakken et al. 2010). However, the protective  
51 effect of the coating is found to be temporary. Studies show that when applying acrylics, a kind of paint  
52 that is widely used, to eight different commercial hardwood surfaces and putting them under the open  
53 air, the painting layer would be degraded as early as a year, and even the most resistant one will be  
54 cracking and peeling within five years(De Windt et al. 2014). Microorganisms that cause  
55 biodeterioration and biodegradation are often found on the surface of the painting, including bacteria  
56 such as *Bacillus*, *Pseudomonas*, *Enterobacter*, *Actinomyces*, and various fungi such as *Aspergillus*,  
57 *Trichoderma*, *Altemaria*, *Cladosporium*, and *Acremonium*(Hyvarinen et al. 2002; Phulpoto et al. 2020).  
58 Apart from that, the increased relative humidity can further cause the swelling of the coating; the  
59 mechanical stresses and physical weathering can lead to the coating's mottling, cracking, and flaking,  
60 and eventually, the wooden surface will be exposed(Phulpoto et al. 2020).

61  
62 The diversity of microbiota colonized on the surface of wooden cultural relics can be affected by  
63 humans. On the one hand, human activities can affect the original microbial community structure,  
64 resulting in damage to the surfaces of cultural relics. With the prosperity of tourism, more and more  
65 cultural heritages are open to people, and the microorganisms carried on the skin or hair may fall on the  
66 surface of cultural relics and challenge the balance of the former microbial ecology  
67 equilibrium(Pasquarella et al. 2015). Once the invaders adapt to the environmental conditions, they will  
68 successfully colonize the surface and destroy the original community structure(Pasquarella et al. 2015).  
69 In addition, human activities may bring in various organic substances, which can change the nutritional  
70 balance on the surface of the original cultural relics and result in the community structure(Saiz-Jimenez  
71 2012). On the other hand, visitor flow rate sometimes may affect microbial diversity. For instance,  
72 Nattaphon Suphaphimol found that the fungal diversity was different between the two temples with  
73 distinct visitor flow rates in Chiang Mai, Thailand, and microorganisms like *Aspergillus*, *Malassezia*,  
74 and *Toxicocladosporium* which belong to human skin were found on the one with higher visitor flow  
75 rate, the Buak Krok Luang temple(Suphaphimol et al. 2022). However, at the same time, Elsa Fuentes  
76 compared the Granite Buildings located in rural and urban areas and found that the diversity of fungi in  
77 the two places was extremely similar(Fuentes et al. 2021). Tianxiao Li et al.(Li et al. 2022) studied the  
78 microbiome on the steles of Lingyan Temple and determined that changes in the air microbiome due to  
79 natural rainfall, plant respiration, and numerous visitors also affected the composition of the stele  
80 surface microbiota, but the contribution of human traffic to changes in the microbiome was unclear.

81

82 Biocides are a common way to prevent microorganisms. As of present, the chemical biocides for  
83 wooden cultural relics mainly include organic biocides, inorganic biocides, and plant essential  
84 oils(Kakakhel et al. 2019). Some commercialized biocides such as Isothiazolinone, benzalkonium  
85 chloride, and sodium hypochlorite are considered to have good bacteriostatic effects but may cause  
86 harm to the environment and human health at high concentrations(Kampf 2018; Kozirog et al. 2016;  
87 Silva et al. 2020). Currently, plant essential oils have arisen attention for their environmental  
88 friendliness, but whether they could exert obvious antibacterial effects and how to apply them to  
89 practical use are still in question(Antonelli et al. 2020; Palla et al. 2020).

90  
91 The ancestral hall is traditional Chinese wooden architecture, especially prosperous in the southern  
92 areas. Among the ancestral halls we investigated, the oldest ones were built during the Ming Dynasty  
93 (AD1368 to AD1644), and the latest ones were built during the Qing Dynasty (AD1636 to AD1912).  
94 An ancestral hall was built for the people who share the same ancestors to remember and honor  
95 predecessors and inherit family traditions. It has special educational and memorial meanings for every  
96 clan. For example, the Qingxi Ancestral Hall, Ming Min Ancestral Hall and the Fuchen Gong Temple,  
97 which we found in the Kongmei Village in a rural district, still maintain as important and sacred places  
98 for praying and memorizing ancestors. The visitors are usually limited to the local villagers and only  
99 come here at special festivals or anniversary days. More often, the ancestral halls not only retain their  
100 original functions but also become popular activity centers and even important cultural relics today. For  
101 instance, the Lin Clan Ancestral Hall, the Donglin Liang Ancestral Hall and the Liede Lin Clan  
102 Ancestral Hall, are not only places for praying and memorizing, but also open to the local citizens for  
103 gathering and relaxing on usual days; the Chen Clan Ancestral Hall is housing the Guangdong Folk Art  
104 Museum now; the Guan Clan Ancestral Hall and the Sansheng Gongwang Temple, which belong to  
105 Lingnan Impression Garden now and is rated as a national AAAA-level tourist attraction. With  
106 exquisite architectural features, profound historical value and rich humanistic feelings, the ancestral  
107 halls have influenced cultural and architectural developments worldwide.

108  
109 However, as most of the ancestral halls are exposed in the open air for long years without much  
110 protection, most of them are now facing both structural damage and aesthetic damage due to microbial  
111 weathering, physical weathering, and chemical weathering. Microbial weathering often contains the  
112 effects of mechanical and chemical weathering and has become an unavoidable issue for wooden  
113 architecture protection at present. But there are not many studies on the microbial weathering of  
114 ancestral halls now.

115  
116 It is important to determine the types of microorganisms on the surface of ancestral halls and clarify the  
117 mechanism of biological degradation for the long-term preservation of cultural relics. In this research,  
118 we analyzed the microbiota from different ancestral hall surfaces based on 16S and 18S amplicon  
119 sequencing. Considering that the climate condition will affect microbial diversity, we selected all the  
120 sampling ancestral halls in the coastal areas of Guangdong Province to ensure that they are in the same  
121 subtropical monsoon climate(Ding et al. 2022). First of all, we compared the differences and  
122 similarities of the microbial diversity at damaged points under different visitor flow rates and explored  
123 the microorganisms' ability of biological degradation and nutrient cycling. It was found that the  
124 ancestral halls under different visitor flow rates shared the same core group of harmful microorganisms,  
125 which provided the possibility that the ancestral halls in Guangdong Province were allowed to achieve

126 basic long-term antimicrobial protection with a uniform prevention measure. Additionally, we  
127 innovatively compared the difference in microbial diversity between damaged sites and undamaged  
128 sites on the surface of the ancestral hall and predicted the potential risk of depending on a single  
129 protection method (for instance, adding a coating of paint on the surface) for long-term preservation. At  
130 the same time, based on the conventional culturing method, we isolated the microbial strains on the  
131 surface of Chen Clan Ancestral Hall, and verify their ability to degrade lignin and cellulose.  
132 Furthermore, we selected 4 different biocides, including the commercial types and  
133 environment-friendly types, to test the antimicrobial sensitivity of the microbiota from Chen Clan  
134 Ancestral Hall. This research is the largest study on the microbial weathering of ancestral halls and  
135 adds significant reference value for the protection of wooden buildings which are located in  
136 Guangdong Province or under subtropical monsoon climate conditions.  
137

## 138 **Materials and methods**

### 139 **Sample sites**

140 Sampling was carried out at nine wooden ancestral halls in Guangdong Province, located in the  
141 southeast coastal area of China. The ancestral halls chosen are all in the typical subtropical monsoon  
142 climate but differ in the city location, in order to observe the commonalities of the microbiome in  
143 different areas under the same climate condition. According to the distinct visitor flow rate, we divided  
144 the nine ancestral halls into three groups: the urban group (Urb\_CHEN, Urb\_GUAN, Urb\_SAN),  
145 which is in the central city of Guangzhou and has an average hourly population of 10,000 people; the  
146 suburban group (Sub\_LIN, Sub\_DONG, Sub\_LIE), which is in the outskirts of Guangzhou and has an  
147 average hourly population of 100 people; the rural district group (RD\_QING, RD\_FU, RD\_MING),  
148 which is in the country areas of Jieyang and has an average hourly population less than 10.

149  
150 We chose two ancestral halls from each group and took three samplings from the damaged external  
151 surfaces each, including the Urb\_GUAN (GUAN\_1, GUAN\_2, GUAN\_3), the Urb\_SAN (SAN\_1,  
152 SAN\_2, SAN\_3), Sub\_DONG (DONG\_1, DONG\_2, DONG\_3), Sub\_LIE (LIE\_1, LIE\_2, LIE\_3),  
153 RD\_FU (FU\_1, FU\_2, FU\_3), and RD\_MING (MING\_1, MING\_2, MING\_3). And we also chose an  
154 ancestral hall from each group and took two pairs of samplings from damaged and undamaged external  
155 surfaces each, including Urb\_CHEN (CHEN\_D1, CHEN\_U1, CHEN\_D2, CHEN\_U2), Sub\_LIN  
156 (LIN\_D1, LIN\_U1, LIN\_D2, LIN\_U2), and RD\_QING (QING\_D1, QING\_U1, QING\_D2,  
157 QING\_U2). The damaged sites are adjacent to their undamaged counterparts with the same  
158 environmental conditions, both being sampled to achieve a direct comparison of microbiome  
159 colonization.

160

### 161 **Environmental data recording**

162 Relative humidity and temperature (RH and C) measurements were taken at each recording site using  
163 SMART SENSOR AS817 Humidity & Temperature Meter. Light (lux) measurements were taken at  
164 each sampling spot using SMART SENSOR AS803 Digital Lux Meter. The moisture contents of the  
165 wood sampled were obtained using SMART SENSOR AS981 Moisture Meter. The number of hourly  
166 visitors was recorded by counting at the entrance of the ancestral hall for an arbitrary hour of the day as  
167 well as asking for the official statistics from the staff in charge.

168

169 Information regarding details of the sampling location, such as the relative altitude from ground level  
170 and the direction of the wood face (aspect), was recorded along with the environmental factors above.  
171 The data and the photographs were taken to allow accurate resampling at a future date if necessary.

172

### 173 **Surface sampling**

174 Sampling was performed using sterile swabs. To obtain samples a sterile swab was dipped in sterile M9  
175 salts (Sigma-Aldrich, Germany) and wiped over a 5 cm square region of the surface. Fresh M9 salts  
176 were used for each sample to prevent cross-contamination between sampling sites. At all stages of  
177 sampling, nitrile gloves were worn to prevent contamination of the samples with skin microbiota.  
178 Samples were stored at 4°C for further culturing or sequencing.

179

### 180 **Amplicon Sequencing Analysis**

181 The 16S rRNA V3–V4 amplicon was amplified using 2×Hieff® Robust PCR Master Mix  
182 (Yeasen,10105ES03, China). Two universal bacterial 16S rRNA gene amplicon PCR primers were used:  
183 the Nobar\_341F (5'-CCTACGGGNGGCWGCAG-3') and the Nobar\_805R (5'-  
184 GACTACHVGGGTATCTAATCC -3'). The reaction was set up as follows: microbial DNA (10ng/μl)  
185 2μl; amplicon PCR forward primer (10μM) 0.5μl; amplicon PCR reverse primer (10 μM) 0.5μl; 2×Taq  
186 Master Mix (Sangon Biotech, B639295, China) 12.5μl; 9.5μL ddH<sub>2</sub>O (total 25μl). The plate was  
187 sealed and PCR was performed in a thermal instrument (T100 Thermal Cycle 1861096, USA) using the  
188 following program: 1 cycle of denaturing at 95 °C for 3 min, the first 5 cycles of denaturing at 95 °C  
189 for 30 s, annealing at 55 °C for 30 s, elongation at 72 °C for 1min 30 s, then 35 cycles of denaturing at  
190 95 °C for 30 s, annealing at 55 °C for 30 s, elongation at 72 °C for 1min 30 s and a final extension at  
191 72 °C for 10 min.

192

193 The 18S rRNA V4 amplicon was amplified using 2×Hieff® Robust PCR Master Mix  
194 (Yeasen,10105ES03, China). Two universal fungal 18S rRNA V4 gene amplicon PCR primers were  
195 used: the 18SV4-forward primer (5'-GGCAAGTCTGGTGCCAG-3') and the 18SV4-reverse primer  
196 (5'-ACGGTATCTRATCCTTCG-3'). The reaction was set up as follows: microbial DNA (10ng/μl)  
197 2μl; amplicon PCR forward primer (10μM) 1μl; amplicon PCR reverse primer (10 μM) 1μl; 2×Hieff®  
198 Robust PCR Master Mix (Yeasen,10105ES03, China) 15μl (total 30μl). The plate was sealed and PCR  
199 was performed in a thermal instrument ((Applied Biosystems 9700, USA) using the following program:  
200 1 cycle of denaturing at 94 °C for 3 min, the first 5 cycles of denaturing at 94 °C for 30 s, annealing at  
201 45 °C for 20 s, elongation at 65 °C for 30 s, then 20 cycles of denaturing at 94°C for 20 s, annealing at  
202 55 °C for 20 s, elongation at 72 °C for 30 s and a final extension at 72 °C for 5 min.

203

204 Samples were delivered to Sangon BioTech (shanghai) for library construction using universal Illumina  
205 adaptor and index. Before sequencing, the DNA concentration of each PCR product was determined  
206 using a Qubit® 4.0 Green double-stranded DNA assay and it was quality controlled using a bioanalyzer  
207 (Agilent 2100, USA). Depending on coverage needs, all libraries can be pooled for one run. The  
208 amplicons from each reaction mixture were pooled in equimolar ratios based on their concentration.  
209 According to the manufacturer's instructions, sequencing was performed using the Illumina MiSeq  
210 system (Illumina MiSeq, USA). Sequence processing, OTU clustering, Representative tags alignment,  
211 and biological classification were performed. After sequencing, the two short Illumina readings were

212 assembled by PEAR software (version 0.9.8) according to the overlap and fastq files were processed to  
213 generate individual fasta and qual files, which could then be analyzed by standard methods. The  
214 effective tags were clustered into operational taxonomic units (OTUs) of  $\geq 97\%$  similarity using Usearch  
215 software (version 11.0.667). Chimeric sequences and singleton OTUs (with only one read) were  
216 removed, after which the remaining sequences were sorted into each sample based on the OTUs. The  
217 tag sequence with the highest abundance was selected as a representative sequence within each cluster.  
218 Bacterial and fungal OTU representative sequences were classified taxonomically by blasting against  
219 the RDP Database and UNITE fungal ITS Database, respectively.

220

### 221 **Statistical analysis**

222 The  $\alpha$ -diversity indices (such as Chao1, Simpson, and Shannon indices) were quantified in terms of  
223 OTU richness. Beta diversity evaluates differences in the microbiome among samples and is normally  
224 combined with dimensional reduction methods such as principal coordinate analysis (PCoA),  
225 non-metric multidimensional scaling (NMDS), or constrained principal component analysis (PCA) to  
226 obtain visual representations.

227

### 228 **Function prediction**

229 Functional prediction analysis of bacteria using PICRUSt (v1.1.4) software, by comparing existing  
230 sequencing data with a microbial reference genome database of known metabolic functions, enabling  
231 the prediction of bacterial metabolic functions.

232

### 233 **Isolation, and identification of microorganisms**

234 Microorganisms were isolated from the swabs by adding 4ml of M9 salts to the swab holder and  
235 vortexing at 180rpm at 30°C for 3h. The resulting suspension was then plated out onto non-selective  
236 media—BPM plates (Beef extract Peptone Medium) for bacteria growth and PDA plates (Potato  
237 Dextrose Agar Medium, adding 0.1g/L chloramphenicol to avoid bacteria growth) for fungi growth,  
238 and cultured for 2-7days at 28°C following various growing status. Then we separated the colonies  
239 according to their colors and morphologies and repeated the isolating process until obtaining the  
240 purebred strains.

241

242 Total community genomic DNA extraction was performed using the CTAB Extraction Method(Moller  
243 et al. 1992).

244

245 The 16S rRNA V3–V4 amplicon was amplified using 2×Taq Master Mix (Sangon Biotech, B639295,  
246 China). Two universal bacterial 16S rRNA gene amplicon PCR primers were used: 27F  
247 (5'-AGAGTTTGATCCTGGCTCAG-3') and 1492R (5'-GGTTACCTTGTTACGACTT-3'). The  
248 reaction was set up as follows: microbial DNA (10ng/ $\mu$ l) 2 $\mu$ l; amplicon PCR forward primer (10 $\mu$ M)  
249 0.5 $\mu$ l; amplicon PCR reverse primer (10  $\mu$ M) 0.5 $\mu$ l; 2×Taq Master Mix (Sangon Biotech, B639295,  
250 China) 12.5 $\mu$ l; 9.5 $\mu$ L ddH<sub>2</sub>O (total 25 $\mu$ l). The plate was sealed and PCR was performed in a thermal  
251 instrument (T100 Thermal Cycle 1861096, USA) using the following program: 1 cycle of denaturing at  
252 95 °C for 3 min, 35 cycles of denaturing at 95 °C for 30 s, annealing at 55 °C for 30 s, elongation at  
253 72 °C for 1min 30 s and a final extension at 72 °C for 10 min.

254



255 The ITS amplicon was amplified using 2×Taq Master Mix (Sangon Biotech, B639295, China). Two  
256 universal ITS amplicon PCR primers were used: the ITS1-forward primer  
257 (5'-TCCGTAGGTGAACCTGCGG-3') and the ITS4-reverse primer  
258 (5'-TCCTCCGCTTATTGATATGC-3'). The reaction was set up as follows: microbial DNA (10ng/μl)  
259 2μl; amplicon PCR forward primer (10μM) 0.5μl; amplicon PCR reverse primer (10 μM) 0.5μl; 2×Taq  
260 Master Mix (Sangon Biotech, B639295, China) 12.5μl; 9.5μL ddH<sub>2</sub>O (total 25μl). The plate was  
261 sealed and PCR was performed in a thermal instrument (T100 Thermal Cycle 1861096, USA) using the  
262 following program: 1 cycle of denaturing at 95 °C for 3 min, 35 cycles of denaturing at 95 °C for 30 s,  
263 annealing at 55 °C for 30 s, elongation at 72 °C for 1min and a final extension at 72 °C for 10 min.

264

### 265 **Identification of cellulolytic microbes and ligninolytic microbes**

266 Sodium carboxymethyl cellulose (CMC-Na) was used to screen cellulolytic strains and guaiacol was  
267 used to screen ligninolytic microbes. Detailed information on each medium is below. CMC-degrading  
268 agar medium for bacteria (per liter): CMC-Na 15.0g, Na<sub>2</sub>HPO<sub>4</sub>·7H<sub>2</sub>O 12.8g, KH<sub>2</sub>PO<sub>4</sub> 3.0g, NaCl 0.5g,  
269 NH<sub>4</sub>Cl 1.0g, agar 15.0g; CMC-degrading agar medium for fungi (per liter): CMC-Na 2.0g, KH<sub>2</sub>PO<sub>4</sub>  
270 1.0g, MgSO<sub>4</sub> 0.5g, (NH<sub>4</sub>)<sub>2</sub>SO<sub>4</sub> 2.0g, NaCl 0.5g, agar 18.0g; lignin-degrading agar medium for bacteria  
271 (per liter): 9mmol guaiacol, yeast extract 50mg, Na<sub>2</sub>HPO<sub>4</sub>·7H<sub>2</sub>O 12.8g, KH<sub>2</sub>PO<sub>4</sub> 3.0g, NaCl 0.5g,  
272 NH<sub>4</sub>Cl 1.0g , agar15.0g; lignin-degrading agar medium for fungi (per liter): 8mmol guaiacol, MgSO<sub>4</sub>  
273 0.5g, KH<sub>2</sub>PO<sub>4</sub> 1.0g, Na<sub>2</sub>HPO<sub>4</sub> 0.2g. No additional carbon source but CMC-Na was added to the  
274 CMC-degrading agar medium, to make sure that the only carbon source during the microbial growth  
275 came from the degradation of cellulose. A small amount of yeast extract was added to the  
276 lignin-degradation agar medium as an auxiliary carbon source component. Incubated the plates at 28°C  
277 for 48 hours (bacteria) or 96 hours (fungi) and examined the diameter of the degradation circles, which  
278 was measured in millimeters with the scale ruler and noted.

279

### 280 **The disk-diffusion test of biocides**

281 Isothiazolinone, NaClO, Thymus Vulgaris Essential Oil, and Cinnamon Essential Oil were used to  
282 carry out the test. Antimicrobial sensitivity of the microorganisms isolated from the four samples of  
283 Urb\_CHEN was detected by agar disk-diffusion procedure. The bacterial suspension (at the log phase)  
284 was plated on BPM agar medium and the spore suspension was plated on PDA agar medium. The disks  
285 (6-mm diameter) were soaked in biocides for an hour before being placed on the plates. The isolated  
286 strains were detected by the four biocides respectively at the concentration of 1%, to verify whether the  
287 biocide has an effect on the isolation itself. The mix strains of each sample were detected by the four  
288 biocides respectively at a concentration gradient (1%, 0.5%, 0.25%, 0.125%, 0.1%, 0.05%, 0.01%), to  
289 observe the antimicrobial effect trend on the whole microbiome. Incubated the plates at 28°C for 48  
290 hours (bacteria) or 96 hours (fungi) and examined the diameter of the inhibition zone, which was  
291 measured in millimeters with the scale ruler and noted.

292

## 293 **3. Results**

### 294 **3.1. Characteristics of the samples**

295 Nine ancestral halls with different visitor flow rates were selected for sample collection. According to

296 the distances from the central area, they can be divided into three groups, the urban group (Chen Clan  
297 Ancestral Hall, Guan Clan Ancestral Hall, Sansheng Gongwang Temple), which is in the central city of  
298 Guangzhou; the suburban group (Lin Clan Ancestral Hall, Donglin Liang Ancestral Hall, Liede Lin  
299 Clan Ancestral Hall), which is in the outskirts of Guangzhou; the rural district group (Qingxi Ancestral  
300 Hall, Ming Min Ancestral Hall, Fuchen Gong Temple), which is in the country areas of Jieyang(Figure  
301 1).

302

303 Long-term weathering has caused damage to the paint coating. We investigated the microbial  
304 colonization of these peeling paint surfaces and the obvious microbial stain was found in most of them.  
305 For instance, the surface of the wooden railing (GUAN\_2) is covered with dark green biofilm; the  
306 surface of the wooden door (SAN\_3), the surface of the wooden pillar (DONG\_1), and the surface of  
307 the shrine (FU\_3) can be observed to have white biofouling; obvious black biofilms can be seen on the  
308 threshold (FU\_2) and the sacrificial table (MING\_1); and yellow plaques can be found on the wooden  
309 screen (QING\_2). The microorganism colonization leads to aesthetic damage and structural damage to  
310 the ancestral hall.

311

312 To determine the environmental conditions of the sampling sites, we measured the temperature, relative  
313 humidity, light, moisture contents of the wood, relative altitude from ground level, and the direction of  
314 the wood face at all sampling points (Table S1).

315

#### 316 **Determining the diversity of microbial communities from samples using amplicon sequencing**

317 Most of the samples showed high-quality sequencing results, except for sample MING\_3, in which the  
318 concentration of DNA fragments could not meet the required concentration of sequencing even after  
319 increasing the amount of amplified DNA and adding two rounds of PCR cycles, and had to be  
320 discarded in the following analysis. After quality control and optimization of the DNA fragments,  
321 20,000 to 120,000 raw data were generated at each sample, and the corresponding Operational  
322 Taxonomic Unit (OTU) numbers produced ranged from 78 to 472 for bacteria and 11 to 108 for fungi  
323 and eukaryotes. The Shannon index evaluates the biodiversity of the sample: the Shannon index of the  
324 18S amplicon is below 2 in most samples, indicating that there are only a few types of fungi on the  
325 surface of the ancestral hall; however, the abundance of bacteria in various samples is quite random,  
326 some are relatively simple, in which the Shannon index is below 0.5, and some have rich microbial  
327 species, in which the Shannon index is up to 5 or more. The alpha diversity index of different samples  
328 did not produce an obvious distribution bias of microbial diversity due to geographical differences. And  
329 the coverage index is equal to 1 for all samples, indicating the uniformity of the sampling (Table S2  
330 and Table S3).

331

332 According to the amplicon sequencing results, the overall taxonomic composition of the colonizing  
333 microbiome on the surface of ancestral halls was determined and organized at the phylum level:  
334 Firmicutes and Proteobacteria were the major bacteria species with high content in urban, suburban,  
335 and rural districts; the two phyla together accounted for more than 84% of the microbiota in every  
336 ancestral hall (Figure 2a and Figure S1a). At the same time, in some ancestral halls, we could also  
337 observe species including Bacteroidetes (Urb\_SAN1.38%, Sub\_LIN7.36%, RD\_QING8.02%,  
338 RD\_MING3.20%), Actinobacteria (Sub\_LIN1.21%, RD\_QING3.46%, RD\_FU2.67%,  
339 RD\_MING9.24%), and Cyanobacteria Chloroplast (RD\_QING1.32%, RD\_MING1.57%) with a



340 content of more than 1%. Ascomycota is the most important eukaryotic microorganism in urban,  
341 suburban, and rural districts, with an abundance of more than 90% at almost every ancestral hall  
342 (except RD\_FU whose abundance is 74.53%) (Figure 2b and Figure S1b).

343

344 Almost all ancestral halls shared some similarities in the dominant microorganisms. The main bacterial  
345 genera are *Bacillus* (except Sub\_LIN, RD\_MING, whose abundances are less than 0.5%) *Pseudomonas*  
346 (except Sub\_LIE, whose abundance is less than 0.1%), *Paenibacillus* (except Sub\_LIE, RD\_MING,  
347 whose abundance is less than 0.5%), *Acinetobacter* (except Urb\_CHEN, RD\_FU, RD\_MING, whose  
348 abundance is less than 0.5%) (Figure 2c and Figure S1c). In the genus-level of eukaryotes, abundances  
349 of *Toxicocladosporium*, *Cladosporium*, *Aspergillus* (except Urb\_CHEN, Sub\_LIE, whose abundance is  
350 less than 0.5%), *Epicoccum* (RD\_QING, RD\_FU, whose abundance is less than 1%) were significant  
351 in all ancestral halls (Figure 2d and Figure S1d).

352

353 The dominant genera in each ancestral hall also have differences. Urb\_GUAN, Urb\_SAN, Sub\_LIE,  
354 and RD\_MING showed a high abundance of *Massilia* (3.68%, 32.93%, 17.22%, 13.96%). Sub\_LIE  
355 also showed a high abundance of *Exiguobacterium* (9.03%) and *Lysinibacillus* (10.55%). In addition,  
356 both Urb\_GUAN and RD\_QING contain a relatively high abundance of *Pantoea* (6.70%, 3.61%)  
357 (Figure 2c and Figure S1c). Sub\_DONG, RD\_FU, and RD\_MING showed a high abundance of  
358 *Hortaea* (11.75%, 1.57%, 6.21%). Sub\_LIN showed a high abundance of *Didymella* (24.55%). RD\_FU  
359 showed a high abundance of *Sarcosphaera* (10.98%) and *Rhizophlyctis* (7.40%) (Figure 2d and Figure  
360 S1d).

361

362 Based on the microbial information of the damage points of different ancestral halls, we selected one  
363 ancestral hall in each group (the urban/suburb/rural district): Chen Clan Ancestral Hall, Lin Clan  
364 Ancestral Hall, and Qingxi Ancestral Hall. We took two pairs of samplings from damaged and  
365 undamaged surfaces each. The damaged sites are adjacent to their undamaged counterparts with the  
366 same environmental conditions, both being sampled to achieve a direct comparison of microbiome  
367 colonization. To make sure that the differences between damaged and undamaged sampling points  
368 result from microbial colonization on the surface, we monitored the environmental data including the  
369 temperature, relative humidity, water content of the wood, and light, and ensure the conditions of a pair  
370 are consistent.

371

372 The collinear relationship diagram showed that: for bacterial genera, *Paenibacillus*, *Bacillus*, and  
373 *Acinetobacter* were easier to find at the damaged points, while *Pantoea*, *Curtobacterium*, and  
374 *Cellulomonas* were easier to find at the undamaged points; the probability of *Pseudomonas* to be found  
375 in the damaged points and the undamaged points were basically the same (Figure 2e and Figure S1e).  
376 For eukaryotic microorganisms, the genera with high abundance at the damaged points and the  
377 undamaged points showed extremely high commonality. The relative abundance of  
378 *Toxicocladosporium* and *Cladosporium* in the damaged and undamaged points was similar, and the  
379 total content was close to 80%, which were the main genera in both damaged and undamaged points  
380 with an extremely high possibility to be found. Differences also existed. *Didymella* and *Epicoccum*  
381 were easier to find at the damaged points, and *Aspergillus* was more likely to be found at the  
382 undamaged points (Figure 2f and Figure S1f).

383

### 384 **Genetic function prediction for the microbial communities based on KEGG**

385 We predicted cellulose degradation for all sequencing samples based on KEGG analysis and found that  
386 it was possible to reconstruct a complete cellulose degradation process for all the studied sites (Figure  
387 3a). A complete pathway of cellulose metabolism can be found on all the samples: cellulose is  
388 decomposed into cellulose dextrin through two metabolic pathways K01179 and K01188, and then  
389 further decomposed into cellobiose.

390

391 We also summarized the relative abundance of five microbial biological cycle functions related to the  
392 basic nutrient cycle, to judge the microorganisms' ability to long-term colonization on the surfaces of  
393 ancestral halls (Figure 3b, Figure 3c and Figure 3d). Among the microbial groups that colonized the  
394 surface of the ancestral hall, the two basic cycles of carbon fixation of prokaryotic carbon and nitrogen  
395 metabolism were the most abundant. Simultaneous sulfur metabolism, photosynthetic carbon fixation,  
396 and methane metabolism also existed in this microbiota, which showed that the microbiota existing on  
397 the damaged surface of the ancestral hall has the possibility of realizing an independent nutrient supply,  
398 allowing microorganisms of the ancestral hall to colonize the surface for a long time.

399

400 In the functional analysis of the nitrogen cycle, we found that the microbial groups on the surface of the  
401 damaged points have complete corresponding metabolic pathways including nitrogen fixation, nitrate  
402 reduction, and denitrification processes. Some ancestral halls (RD\_QING, RD\_MING) also have the  
403 function of nitrification. It is particularly worth noting that our amplicon dataset retrieves a large  
404 number of annotated sequences (K02586, K02588, and K02591) associated with genes involved in  
405 nitrogen fixation. It is manifested by the phenomenon that the nine ancestral halls all contain these  
406 pathways, and the content is extremely high in Qingxi Ancestral Hall and Mingmin Ancestral Hall  
407 when compared with other ones, indicating that the surfaces of all ancestral halls have the basic  
408 potential to achieve nitrogen fixation (Table S4). It showed that these microbial groups have a  
409 relatively strong ability to fix nitrogen and produce ammonium salt, and the presence of ammonium  
410 salt will promote microorganisms' degradation of wood cellulose, which will make it easier for the  
411 microbiome to obtain essential nutrients from wood, and further damage the wooden structure of  
412 ancestral halls(Harindintwali et al. 2022).

413

414 At the same time, there is no methane-producing metabolic pathway to be found in all samples; a  
415 certain number of methane oxidation-related gene pathways such as k10944, k10945, and k10946 can  
416 be found in most ancestral halls (Urb\_CHEN, Urb\_GUAN, Urb\_SAN, Sub\_DONG, Sub\_LIE), but the  
417 contributions are relatively minor in our amplicon dataset.

418

### 419 **Verification of the degrading ability of microorganisms from Urb\_CHEN based on conventional** 420 **culturing methods**

421 A total of 7 different species of bacteria and 9 different species of fungi were isolated from the  
422 Urb\_CHEN samples using conventional culturing methods (Table 2). The isolated and dominant  
423 microorganisms shown in the amplicon sequencing are consistent. All isolates were tested for cellulose  
424 and lignin degradation ability except the *Staphylococcus* strain; no follow-up experiments were carried  
425 out because of its pathogenicity.

426

427 Among all the bacteria, *Pseudomonas* sp., *Pantoea dispersa* strain, *Paenibacillus* sp., *Bacillus cereus*

428 strain, and *Priestia megaterium* strain showed both cellulose-degradation ability and lignin-degradation  
429 ability (Figure 4a-e); *Curtobacterium* sp. could degrade lignin but not cellulose (Figure 4f);  
430 *Microbacterium oleivorans* strain could not degrade both lignin and cellulose (data could not be  
431 shown). As for the fungi, *Aureobasidium pullulans* strain., *Cladosporium* sp., *Trichoderma* sp.,  
432 *Daldinia* sp., and *Aspergillus sydowii* strain could degrade cellulose but not lignin, which is manifested  
433 by the obvious hydrophytic zones on plates (Table 3 and Figure S2a-e); *Rhodotorula mucilaginos*  
434 strains and *Cystobasidium* sp. could not degrade both lignin and cellulose (data could not be shown).

435

#### 436 **Antimicrobial sensitivity test of the microorganisms from Urb\_CHEN**

437 Using biocides is an important means to inhibit biodeterioration on the surface of cultural relics. Four  
438 biocides were selected: Isothiazolinone, Sodium hypochlorite, Thymus Vulgaris Essential Oil, and  
439 Cinnamon Essential Oil. The antimicrobial sensitivity of the microorganisms from the four samples of  
440 Urb\_CHEN was detected by the agar disk-diffusion method.

441

442 For the mix strains, we found that Isothiazolinone had a complete antimicrobial effect on fungi, and it  
443 is also the only biocide to show a significant inhibitory effect on bacteria (for the four samples  
444 CHEN\_D1, CHEN\_U1, CHEN\_D2, and CHEN\_U2, the diameters of each inhibition zone were  
445  $25.50\pm 0.50\text{mm}$ ,  $29.00\pm 1.73\text{mm}$ ,  $28.17\pm 1.76\text{mm}$ , and  $48.33\pm 2.08\text{mm}$ ). Sodium hypochlorite showed  
446 little antibacterial function but exhibited an inhibitory effect on fungi (for the four samples CHEN\_D1,  
447 CHEN\_U1, CHEN\_D2, and CHEN\_U2, the diameters of each inhibition zones were  $26.67\pm 3.06\text{mm}$ ,  
448  $24.00\pm 3.46\text{mm}$ ,  $24.33\pm 2.52\text{mm}$ , and  $19.33\pm 1.15\text{mm}$ ). Thymus Vulgaris Essential Oil and Cinnamon  
449 Essential Oil did not suppress any microbial growth when at a concentration of 1% (v/v). For the  
450 isolated strains, we further tested the antimicrobial effect of Isothiazolinone and Sodium hypochlorite.  
451 Compared to Sodium hypochlorite at a concentration of 1% (w/v), it was observed that Isothiazolinone  
452 at a concentration of 1% showed significant antibacterial effects on all bacteria (Figure 5a and Table 4)  
453 and most of the fungi (Figure 5b and Table 4).

454

455 However, considering that the use of high-concentration Isothiazolinone may have harmful effects on  
456 the environment and human health, the concentration should be appropriately controlled while used as  
457 the biocide. Therefore, the mix strains of each sample were then detected by Isothiazolinone  
458 respectively at a concentration gradient (from 1% to 0.01%) and we tried to observe the antimicrobial  
459 effect trend. It was found that with the decrease in the concentration of Isothiazolinone, the  
460 antimicrobial sensitivity of the bacterial population gradually decreased. For the bacterial strains, even  
461 if the concentration was reduced to 0.05%, there still existed an obvious inhibition zone (Figure 5c).  
462 For the fungal strains, when the concentration of Isothiazolinone was greater than 0.25%, except for  
463 CHEN\_D1, all the fungi in the other three samples showed a significant inhibitory effect with a  
464 diameter of the inhibition zone greater than 6cm, and even if the concentration was reduced to 0.01%,  
465 there still existed an obvious inhibition zone (Figure 5d). The results above show that the microbiota on  
466 the surface of Chen Clan Ancestral Hall is extremely sensitive to Isothiazolinone. Combined with the  
467 results of the amplicon sequencing, we consider that the fungal community of CHEN\_D1 contained a  
468 higher content of *Epicoccum* (35.61%) than other samples, which may be the key factor to the  
469 insignificant antimicrobial effect of Isothiazolinone on CHEN\_D1, resulting in the irregular changes of  
470 the antimicrobial sensitivity following the decreasing concentration of Isothiazolinone. Unfortunately,  
471 the isolate of *Epicoccum* was not obtained during the isolation process, so the antimicrobial sensitivity

472 of Isothiazolinone to this fungus hasn't been further studied yet.

473

## 474 **Discussion**

475 This research is the first to study the problem of microbial weathering in the long-term preservation of  
476 Chinese ancestral halls. We clarify the characteristics of the microbial communities at nine ancestral  
477 halls in the subtropical monsoon climate of Guangdong, compare the sensitivity of the microbiome  
478 from Chen Clan Ancestral Hall to different biocides, and discuss the feasibility of low -concentration  
479 Isothiazolinone being the most suitable choice for wooden cultural relics.

480

481 Microbial weathering has always been an important issue in the conservation of cultural relics, but  
482 there has been little discussion of microbial diversity on the surface of wooden cultural relics. The  
483 limited research on wooden cultural relics mainly focuses on buried or underwater cultural heritage,  
484 buried or waterlogged wood, such as the Wreck Archaeology of " South China Sea I "(Branysova et al.  
485 2022; Mazzoli et al. 2018). However, this research mainly focuses on the microbial degradation  
486 mechanism of ancestral halls, a type of traditional wooden cultural relics that were under the open air  
487 and has been suffering from natural weathering for a long time.

488

489 Wooden structures consist of 40-60% of cellulose, 15-30% of hemicellulose, and 17-35% of  
490 lignin(Velasco-Rodriguez et al. 2022), which are a rich source of nutrition for microorganisms. The  
491 amplicon sequencing results showed that the microbiota on the surface of damaged ancestral halls with  
492 different traffic flows was dominated by Firmicutes, Proteobacteria, and Ascomycota, and may contain  
493 Bacteroidetes and Actinobacteria. At the genus level, it can be further clarified that the common group  
494 of harmful microorganisms in all the damaged sites includes *Bacillus*, *Pseudomonas*, *Paenibacillus*,  
495 *Acinetobacter*, *Toxicocladosporium*, *Cladosporium*, *Aspergillus*, and *Epicoccum*, and is also likely to  
496 contain *Massilia*, *Pantoea*, and *Hortaea*. Firmicutes and Proteobacteria are the major components of  
497 biofilms that could retain essential nutrients and water required by microorganisms(Ding et al. 2022).  
498 The colonization of actinomycetes produces pigments, organic acids, and polysaccharides(Duan et al.  
499 2017) through secondary metabolism, which not only threatens the aesthetics of ancestral halls and  
500 causes acid corrosion of wooden structures, but also promotes the formation of biofilms on the surface.  
501 Firmicutes, Proteobacteria, Bacteroidetes, Actinobacteria, and Ascomycota are also considered the  
502 main phyla for cellulose degradation (Liu et al. 2021). *Cladosporium* and *Aspergillus* were isolated  
503 from lithographs and have been shown to have cellulose-degrading abilities (Coronado-Ruiz et al.  
504 2018). *Cladosporium* is also considered to be the main chromogen in artworks(Sabatini et al. 2018). In  
505 the previous literature, it has been demonstrated that *Cladosporium* is the main microbial disease of  
506 canoes preserved in the Oceanographic Museum of China(Zhang et al. 2019). *Bacillus*, *Paenibacillus*,  
507 *Acinetobacter*, and *Pseudomonas* have all been shown to utilize lignin as the sole carbon  
508 source(Mendes et al. 2021; Xiong et al. 2020). *Pantoea* has been proven to mediate lignin degradation  
509 through the production of laccase and lignin peroxidase (Atiweh et al. 2022).

510

511 As is shown in the KEGG analysis, it is possible to reconstruct a complete reaction process of cellulose  
512 degradation on all the sampling surfaces, and microorganisms can obtain the basic nutrients and energy  
513 needed for survival through carbon fixation, nitrogen fixation, and sulfur cycle. This finding may be the

514 key reason to ensure the long-term persistence of microbiota on the surface of wooden ancestral  
515 halls(Ding et al. 2020).

516

517 At the same time, we further screened and cultivated eight bacterial isolates and seven fungal isolates  
518 from Chen Clan Ancestral Hall. The seven bacterial isolates obtained were consistent with the main  
519 bacterial group of Chen Clan Ancestral Hall shown in the result of amplicon sequencing, while only  
520 two of the fungal isolates appeared in the main fungal group of the amplicon sequencing result. This  
521 may be due to the inability of amplicon sequencing to identify less abundant species(Liu et al. 2018).  
522 Additionally, in the test of the lignocellulose-degrading ability of the isolated strains, it can be found  
523 that six strains of bacteria show lignin-degrading activity, and five strains of bacteria and five strains of  
524 fungi exhibit cellulose-degrading activity. Although *Rhodotorula* and *Cystobacter* show no  
525 lignocellulose-degrading ability, the metabolism production of carotenoids will damage the aesthetics  
526 of ancestral halls and protect biofilms against low-wavelength radiation(Cojoc et al. 2019).  
527 *Microbacterium oleivorans* strain cannot utilize lignin and cellulose directly but may be able to utilize  
528 cellobiose for nutrients(Lian et al. 2016).

529

530 With the development of the increasingly prosperous cultural tourism industry, the visitor flow rate  
531 shows a significant contribution to the composition of microbial communities on the surface of cultural  
532 relics. Nowadays, ancestral halls have become important local scenic spots with their aesthetic  
533 significance and enlightening function. The microbiota brought by human activities will affect the  
534 original microbial community structure on the surface and may lead to further biodeterioration of  
535 cultural relics. Amplicon sequencing results indicated that *Aspergillus* and *Toxicocladosporium* were  
536 the dominant fungal genera on the surface of all the damaged sites of the ancestral halls. *Aspergillus*  
537 and *Epicoccum* were found to belong to the most common fungal genera on human feet(Adamczyk et  
538 al. 2020). The type strain of *Toxicocladosporium* was isolated from moldy paint in Suriname and was  
539 found to cause skin disease(Bezerra et al. 2017). *Acinetobacter* and *Pseudomonas* are considered  
540 human skin bacterial residents(Adamczyk et al. 2020). At the same time, the microorganisms on the  
541 surface of the Chen Clan Ancestral Hall obtained based on the conventional cultivation method, such as  
542 *Bacillus cereus*, which is also a common microorganism in human hands(Adamczyk et al. 2020); and  
543 *Staphylococcus* is a pathogenic bacteria of human bloodstream infection that can form biofilm(Szczuka  
544 et al. 2015). Many of the genera detected at the damaged sites on the surface of the ancestral hall  
545 showed extremely high correlations with human skin microbiota, which shows that the harm caused by  
546 human activities can be long-term and visitors should avoid touching the cultural relics.

547

548 However, the Shannon index also indicated that the microbial diversity on the surface of damaged sites  
549 of ancestral halls did not change significantly with the increase of human flow, and the dominant  
550 microbial groups on the surfaces of all ancestral halls had obvious similarities in species. This may be  
551 because the original microbial community on the surface has formed a stable biofilm, which facilitates  
552 the adsorption and adaptation of the invader microorganisms to the surface of cultural relics.  
553 Additionally, the microbiota carried by humans shows great adaptability to the surfaces of ancestral  
554 halls due to the ability to degrade lignocellulose. Therefore, it can also adapt to the environment on the  
555 surface of the ancestral hall with only a small amount of microorganisms(Negi and Sarethy 2019). The  
556 discovery allows most of the ancestral halls in Guangdong to use a unified approach for long-term  
557 antimicrobial preservation.

558

559 It is worth noting that, *Pseudomonas*, *Toxicocladosporium*, *Cladosporium*, and other potential  
560 microbial diseases that cause wood to suffer from microbial deterioration also exist on the surface of  
561 the ancestral hall with intact paint. And it is also easier to find *Pantoea*, *Curtobacterium*, *Cellulomonas*,  
562 *Didymella*, and *Epicoccum* where the paint surface is not damaged and the wood is not exposed. The  
563 presence of paint, especially paint containing urushiol (a component with an antimicrobial effect), has  
564 been considered to play a good role in the protection of cultural relics(Kim et al. 2021). However, our  
565 research shows that on the surface of the undamaged ancestral hall, in other words, the coating of paint,  
566 there also exists microbial communities that cause microbial degradation of cultural relics. On the one  
567 hand, the similarity of microbial species may be caused by the spread of microorganisms which is due  
568 to the adjacent location of the damaged sites and the undamaged sites. On the other hand, the  
569 microorganisms may have the effect of degrading paint. For example, *Pantoea*, *Pseudomonas*,  
570 *Cladosporium* and *Epicoccum* have been proven to be able to degrade paint as well as wood(Sanmartin  
571 et al. 2015; Shirakawa et al. 2002), so they can colonize the surface of ancestral halls with complete  
572 paint. Generally speaking, due to the slow rate of microbial degradation of paint, it is rare to observe  
573 obvious microbial stains on the paint surface. Above all, taking the method of adding a coat of paint on  
574 the surfaces of wooden cultural relics as the only antimicrobial preservation measure should be  
575 prudent.

576

577 In order to control the degradation of microorganisms on the surface of cultural relics, more and more  
578 biocides have been applied to the protection of cultural relics. However, at the same time, more and  
579 more biocides have been proven to be harmful to the environment and human health. Therefore, new  
580 biocides represented by plant essential oil extracts have aroused attention due to their environmental  
581 friendliness(Cappitelli et al. 2020). Unfortunately, cinnamon essential oil and thyme essential oil show  
582 a weak antimicrobial effect in this research. As for the mature commercial biocides, compared to  
583 sodium hypochlorite, Isothiazolinone is a more effective biocide and exhibits a pronounced effect.  
584 However, excessive use of Isothiazolinone is considered to be harmful to the environment and human  
585 health(Romani et al. 2022). The research tried to reduce this hazard by reducing the concentration of  
586 Isothiazolinone. We found that when the concentration of Isothiazolinone is set at 0.05% (v/v) (for  
587 bacteria) and 0.01% (v/v) (for fungi) and applied to the sensitivity test on the microbiota of the samples  
588 obtained from Chen Clan Ancestral Hall, the sizes of the inhibition zones were all greater than 10mm,  
589 and some were even greater than 15mm, showing moderate or even high sensitivity(Fu et al. 2022).  
590 The results show that it is feasible to reduce environmental damage while achieving an antimicrobial  
591 effect by using low-concentration Isothiazolinone; but even so, the harmful effects of Isothiazolinone  
592 should still be carefully concerned.

593

## 594 **Conclusion**

595 In conclusion, the microbial community on the surface of nine ancestral halls with different visitor flow  
596 rates in the subtropical monsoon climate of Guangdong Province's coastal areas was analyzed using the  
597 conventional culturing method together with amplicon sequencing. A core microorganism group was  
598 detected, including *Bacillus* sp., *Pseudomonas* sp., *Paenibacillus* sp., *Acinetobacter* sp.,  
599 *Toxicocladosporium* sp., *Cladosporium* sp., *Aspergillus* sp., and *Epicoccum* sp.. And a proportion of the



600 species isolated and purified from the community showed lignin or cellulose degradation capacity.  
601 Human activity can cause a similar microbial colonization despite of different visitor flow rates, which  
602 allows the ancestral halls located in Guangdong Province to adopt a same approach to avoid microbial  
603 deterioration. There is also a risk of much more biodeterioration if ancestral halls are only protected  
604 through a coating of paint. Biocide is a common method of microbial control. In this study,  
605 low-concentration Isothiazolinone was confirmed to be an effective inhibitor. However, when used in  
606 practical, we should consider the impact on the environment, cultural heritage, and humans.

607  
608  
609

#### 610 **Data accessibility**

611 Raw sequencing reads about 16S amplicon sequencing and 18S amplicon sequencing are deposited at  
612 the NCBI Sequence Read Archive under the BioProject PRJNA925150 (SRR23110177 to  
613 SRR23110205) and PRJNA925313 (SRR23117924 to SRR23117952). DNA sequences of the bacterial  
614 and fungal isolates are deposited at the NCBI GenBank (accession numbers: OQ283719 to OQ283726,  
615 and OQ283737 to OQ283743). The datasets supporting this article have been uploaded as part of the  
616 supplemental material.

#### 617 **Author's contributions**

618 **Ma.L.:** methodology, validation, formal analysis, investigation, resources, data curation, visualization,  
619 and writing – original draft; **X.S.:** methodology, validation, formal analysis, investigation, resources,  
620 data curation, visualization, and writing – original draft; **Q.W.:** investigation, visualization, and writing  
621 – original draft; **T.Y.:** investigation and resources; **Mu.L.:** investigation, and resources; **P.A.:**  
622 investigation; **J.R.L.:** conceptualization, validation, formal analysis, writing – review and editing,  
623 supervision, and funding acquisition; **J.L.:** conceptualization, validation, formal analysis, writing –  
624 review and editing, and funding acquisition.

#### 625 **Competing interests**

626 We declare we have no competing interests.

#### 627 **Ethics**

628 Permission was obtained from the Villager Committees and the staff in charge of the ancestral halls  
629 before sampling was carried out.

#### 630 **Funding**

631 This work was supported by National Training Program of Innovation and Entrepreneurship for  
632 Undergraduates (grant no. 202210561125).

633 **Acknowledgments**

634 We thank Zhen Yi, Haigan Huang, and all the ancestral hall conservators for their help in collecting  
635 microbiological samples, Yueyue Zhu and Zhenyang Zhang for lab work assistance, the Guangdong  
636 Folk Art Museum, the Kongmei Villager Committee and the Lingnan Impression Garden for support in  
637 the project.  
638

639 **References**

- 640 Adamczyk, K, Garnarczyk, A, Antończak, P, Wcisło-Dziadecka, D (2020) The foot microbiome. J  
641 COSMET DERMATOL-US 19(5):1039-1043 doi:10.1111/jocd.13368
- 642 Antonelli, F, Bartolini, M, Plissonnier, ML, Esposito, A, Galotta, G, Ricci, S, Davide Petriaggi, B,  
643 Pedone, C, Di Giovanni, A, Piazza, S, Guerrieri, F, Romagnoli, M (2020) Essential Oils as  
644 Alternative Biocides for the Preservation of Waterlogged Archaeological Wood.  
645 Microorganisms 8(12) doi:10.3390/microorganisms8122015
- 646 Atiwesh, G, Parrish, CC, Banoub, J, Le, TT (2022) Lignin degradation by microorganisms: A review.  
647 Biotechnol Prog 38(2):e3226 doi:10.1002/btpr.3226
- 648 Bezerra, JDP, Sandoval-Denis, M, Paiva, LM, Silva, GA, Groenewald, JZ, Souza-Motta, CM, Crous,  
649 PW (2017) New endophytic Toxicocladosporium species from cacti in Brazil, and description  
650 of Neocladosporium gen. nov. IMA Fungus 8(1):77-97 doi:10.5598/imafungus.2017.08.01.06
- 651 Branysova, T, Demnerova, K, Durovic, M, Stiborova, H (2022) Microbial biodeterioration of cultural  
652 heritage and identification of the active agents over the last two decades. J Cult Herit  
653 55:245-260 doi:10.1016/j.culher.2022.03.013
- 654 Cappitelli, F, Catto, C, Villa, F (2020) The Control of Cultural Heritage Microbial Deterioration.  
655 Microorganisms 8(10) doi:10.3390/microorganisms8101542
- 656 Cennamo, P, Barone Lumaga, MR, Ciniglia, C, Soppelsa, O, Moretti, A (2018) Heterotrophic  
657 components of biofilms on wood artefacts. J Wood Sci 64(4):417-426  
658 doi:10.1007/s10086-018-1705-0
- 659 Coelho, C, Mesquita, N, Costa, I, Soares, F, Trovao, J, Freitas, H, Portugal, A, Tiago, I (2021) Bacterial  
660 and Archaeal Structural Diversity in Several Biodeterioration Patterns on the Limestone Walls  
661 of the Old Cathedral of Coimbra. Microorganisms 9(4) doi:10.3390/microorganisms9040709
- 662 Cojoc, LR, Enache, MI, Neagu, SE, Lungulescu, M, Setnescu, R, Ruginescu, R, Gomoiu, I (2019)  
663 Carotenoids produced by halophilic bacterial strains on mural paintings and laboratory  
664 conditions. FEMS Microbiol Lett 366(21) doi:10.1093/femsle/fnz243
- 665 Coronado-Ruiz, C, Avendaño, R, Escudero-Leyva, E, Conejo-Barboza, G, Chaverri, P, Chavarría, M  
666 (2018) Two new cellulolytic fungal species isolated from a 19th-century art collection. Sci  
667 Rep 8(1) doi:10.1038/s41598-018-24934-7
- 668 De Windt, I, Van den Bulcke, J, Wuijens, I, Coppens, H, Van Acker, J (2014) Outdoor weathering  
669 performance parameters of exterior wood coating systems on tropical hardwood substrates.  
670 EUR J WOOD WOOD PROD 72(2):261-272 doi:10.1007/s00107-014-0779-7
- 671 Ding, X, Lan, W, Yan, A, Li, Y, Katayama, Y, Gu, J-D (2022) Microbiome characteristics and the key  
672 biochemical reactions identified on stone world cultural heritage under different climate  
673 conditions. J Environ Manage 302 doi:10.1016/j.jenvman.2021.114041

- 674 Ding, XH, Lan, WS, Wu, JP, Hong, YG, Li, YL, Ge, Q, Uriz, C, Katayama, Y, Gu, JD (2020)  
675 Microbiome and nitrate removal processes by microorganisms on the ancient Preah Vihear  
676 temple of Cambodia revealed by metagenomics and N-15 isotope analyses. *Appl Microbiol*  
677 *Biotechnol* 104(22):9823-9837 doi:10.1007/s00253-020-10886-4
- 678 Duan, Y, Wu, F, Wang, W, He, D, Gu, JD, Feng, H, Chen, T, Liu, G, An, L (2017) The microbial  
679 community characteristics of ancient painted sculptures in Maijishan Grottoes, China. *PLoS*  
680 *One* 12(7):e0179718 doi:10.1371/journal.pone.0179718
- 681 Fu, C, Lan, X, Yuan, J, Li, C, Li, L, Yu, Z, Tan, T, Yuan, M, Du, F (2022) Research on the optimization,  
682 key chemical constituents and antibacterial activity of the essential oil extraction process of  
683 *Thuja koraiensis* Nakai. *J Microbiol Methods* 194:106435 doi:10.1016/j.mimet.2022.106435
- 684 Fuentes, E, Carballeira, R, Prieto, B (2021) Role of Exposure on the Microbial Consortiums on  
685 Historical Rural Granite Buildings. *Appl Sci* 11(9) doi:10.3390/app11093786
- 686 Gobakken, LR, Hoibo, OA, Solheim, H (2010) Mould growth on paints with different surface  
687 structures when applied on wooden claddings exposed outdoors. *Int Biodeterior Biodegrad*  
688 64(5):339-345 doi:10.1016/j.ibiod.2009.11.005
- 689 Harindintwali, JD, Wang, F, Yang, WH, Zhou, JL, Muhoza, B, Mugabowindekwe, M, Yu, XB (2022)  
690 Harnessing the power of cellulolytic nitrogen-fixing bacteria for biovalorization of  
691 lignocellulosic biomass. *Industrial Crops and Products* 186:12  
692 doi:10.1016/j.indcrop.2022.115235
- 693 Huang, X, Han, Y, Du, J, Guo, P, Wang, Y, Ma, K, Li, N, Zhang, Z, Li, Y, Pan, J (2021) Inhibitory  
694 Effect of Cinnamaldehyde on Main Destructive Microorganisms of Nanhai No. 1 Shipwreck.  
695 *Appl Sci* 11(11) doi:10.3390/app11115262
- 696 Hyvarinen, A, Meklin, T, Vepsalainen, A, Nevalainen, A (2002) Fungi and actinobacteria in  
697 moisture-damaged building materials - concentrations and diversity. *Int Biodeterior Biodegrad*  
698 49(1):27-37 doi:10.1016/s0964-8305(01)00103-2
- 699 Kakakhel, MA, Wu, FS, Gu, JD, Feng, HY, Shan, K, Wang, WF (2019) Controlling biodeterioration of  
700 cultural heritage objects with biocides: A review. *Int Biodeterior Biodegrad* 143:10  
701 doi:10.1016/j.ibiod.2019.104721
- 702 Kampf, G (2018) Adaptive microbial response to low-level benzalkonium chloride exposure. *J Hosp*  
703 *Infect* 100(3):e1-e22 doi:10.1016/j.jhin.2018.05.019
- 704 Kim, M-J, Choi, Y-S, Oh, J-J, Kim, G-H (2020) Experimental investigation of the humidity effect on  
705 wood discoloration by selected mold and stain fungi for a proper conservation of wooden  
706 cultural heritages. *J Wood Sci* 66(1) doi:10.1186/s10086-020-01878-z
- 707 Kim, S, Lee, H, Jeong, S, Chung, Y (2021) Biological distribution and environmental monitoring for  
708 the conservation of Janggyeong panjeon Depositories and Daejanggyeongpan (Printing  
709 Woodblocks of the Tripitaka Koreana) of Haeinsa Temple in Korea. *Int Biodeterior Biodegrad*  
710 156 doi:10.1016/j.ibiod.2020.105131
- 711 Kozirog, A, Rajkowska, K, Otlewska, A, Piotrowska, M, Kunicka-Styczynska, A, Brycki, B,  
712 Nowicka-Krawczyk, P, Koscielniak, M, Gutarowska, B (2016) Protection of Historical Wood  
713 against Microbial Degradation-Selection and Application of Microbiocides. *Int J Mol Sci* 17(8)  
714 doi:10.3390/ijms17081364
- 715 Li, T, Cai, Y, Ma, Q (2022) Microbial Diversity on the Surface of Historical Monuments in Lingyan  
716 Temple, Jinan, China. *Microb Ecol* doi:10.1007/s00248-021-01955-w
- 717 Lian, J, Choi, J, Tan, YS, Howe, A, Wen, Z, Jarboe, LR (2016) Identification of Soil Microbes Capable

- 718 of Utilizing Cellobiosan. *PLoS One* 11(2):e0149336 doi:10.1371/journal.pone.0149336
- 719 Liu, L, Huang, W-C, Liu, Y, Li, M (2021) Diversity of cellulolytic microorganisms and microbial  
720 cellulases. *Int Biodeterior Biodegrad* 163 doi:10.1016/j.ibiod.2021.105277
- 721 Liu, Z, Zhang, Y, Zhang, F, Hu, C, Liu, G, Pan, J (2018) Microbial Community Analyses of the  
722 Deteriorated Storeroom Objects in the Tianjin Museum Using Culture-Independent and  
723 Culture-Dependent Approaches. *Front Microbiol* 9 doi:10.3389/fmicb.2018.00802
- 724 Mazzoli, R, Giuffrida, MG, Pessione, E (2018) Back to the past: "find the guilty bug-microorganisms  
725 involved in the biodeterioration of archeological and historical artifacts". *Appl Microbiol  
726 Biotechnol* 102(15):6393-6407 doi:10.1007/s00253-018-9113-3
- 727 Mendes, IV, Garcia, MB, Bitencourt, ACA, Santana, RH, Lins, PC, Silveira, R, Simmons, BA, Gladden,  
728 JM, Kruger, RH, Quirino, BF (2021) Bacterial diversity dynamics in microbial consortia  
729 selected for lignin utilization. *PLoS One* 16(9):e0255083 doi:10.1371/journal.pone.0255083
- 730 Moller, EM, Bahnweg, G, Sandermann, H, Geiger, HH (1992) A simple and efficient protocol for  
731 isolation of high molecular weight DNA from filamentous fungi, fruit bodies, and infected  
732 plant tissues. *Nucleic Acids Res* 20(22):6115-6 doi:10.1093/nar/20.22.6115
- 733 Negi, A, Sarethy, IP (2019) Microbial Biodeterioration of Cultural Heritage: Events, Colonization, and  
734 Analyses. *Microb Ecol* 78(4):1014-1029 doi:10.1007/s00248-019-01366-y
- 735 Palla, F, Bruno, M, Mercurio, F, Tantillo, A, Rotolo, V (2020) Essential Oils as Natural Biocides in  
736 Conservation of Cultural Heritage. *Molecules* 25(3) doi:10.3390/molecules25030730
- 737 Pasquarella, C, Balocco, C, Pasquariello, G, Petrone, G, Saccani, E, Manotti, P, Ugolotti, M, Palla, F,  
738 Maggi, O, Albertini, R (2015) A multidisciplinary approach to the study of cultural heritage  
739 environments: Experience at the Palatina Library in Parma. *Sci Total Environ* 536:557-567  
740 doi:10.1016/j.scitotenv.2015.07.105
- 741 Phulpoto, AH, Maitlo, MA, Kanhar, NA (2020) Culture-dependent to culture-independent approaches  
742 for the bioremediation of paints: a review. *Int J Environ Sci Technol* 18(1):241-262  
743 doi:10.1007/s13762-020-02801-1
- 744 Romani, M, Warscheid, T, Nicole, L, Marcon, L, Di Martino, P, Suzuki, MT, Lebaron, P, Lami, R (2022)  
745 Current and future chemical treatments to fight biodeterioration of outdoor building materials  
746 and associated biofilms: Moving away from ecotoxic and towards efficient, sustainable  
747 solutions. *Sci Total Environ* 802 doi:10.1016/j.scitotenv.2021.149846
- 748 Sabatini, L, Sisti, M, Campana, R (2018) Evaluation of fungal community involved in the  
749 biodeterioration process of wooden artworks and canvases in Montefeltro area (Marche, Italy).  
750 *Microbiol Res* 207:203-210 doi:10.1016/j.micres.2017.12.003
- 751 Saiz-Jimenez, C (2012) Microbiological and environmental issues in show caves. *World J. Microbiol*  
752 28(7):2453-2464 doi:10.1007/s11274-012-1070-x
- 753 Sanmartin, P, DeAraujo, A, Vasanthakumar, A, Mitchell, R (2015) Feasibility study involving the  
754 search for natural strains of microorganisms capable of degrading graffiti from heritage  
755 materials. *Int Biodeterior Biodegrad* 103:186-190 doi:10.1016/j.ibiod.2015.05.010
- 756 Shirakawa, MA, Gaylarde, CC, Gaylarde, PM, John, V, Gambale, W (2002) Fungal colonization and  
757 succession on newly painted buildings and the effect of biocide. *FEMS Microbiol Ecol*  
758 39(2):165-173 doi:10.1016/s0168-6496(01)00214-8
- 759 Silva, V, Silva, C, Soares, P, Garrido, EM, Borges, F, Garrido, J (2020) Isothiazolinone Biocides:  
760 Chemistry, Biological, and Toxicity Profiles. *Molecules* 25(4)  
761 doi:10.3390/molecules25040991

- 762 Skipper, PJA, Skipper, LK, Dixon, RA (2022) A metagenomic analysis of the bacterial microbiome of  
763 limestone, and the role of associated biofilms in the biodeterioration of heritage stone surfaces.  
764 *Sci Rep* 12(1) doi:10.1038/s41598-022-08851-4
- 765 Sterflinger, K, Pinar, G (2013) Microbial deterioration of cultural heritage and works of art--tilting at  
766 windmills? *Appl Microbiol Biotechnol* 97(22):9637-46 doi:10.1007/s00253-013-5283-1
- 767 Suphaphimol, N, Suwannarach, N, Purahong, W, Jaikang, C, Pengpat, K, Semakul, N, Yimklan, S,  
768 Jongjitngam, S, Jindasu, S, Thiangtham, S, Chantawannakul, P, Disayathanoowat, T (2022)  
769 Identification of Microorganisms Dwelling on the 19th Century Lanna Mural Paintings from  
770 Northern Thailand Using Culture-Dependent and -Independent Approaches. *Biology* 11(2)  
771 doi:10.3390/biology11020228
- 772 Szczuka, E, Telega, K, Kaznowski, A (2015) Biofilm formation by *Staphylococcus hominis* strains  
773 isolated from human clinical specimens. *Folia Microbiol* 60(1):1-5  
774 doi:10.1007/s12223-014-0332-4
- 775 Velasco-Rodriguez, O, Fil, M, Heggeset, TMB, Degnes, KF, Becerro-Recio, D, Kolsakova, K, Haugen,  
776 T, Jonsson, M, Toral-Martinez, M, Garcia-Estrada, C, Sola-Landa, A, Josefsen, KD, Sletta, H,  
777 Barreiro, C (2022) Characterization of Microbial Diversity in Decayed Wood from a Spanish  
778 Forest: An Environmental Source of Industrially Relevant Microorganisms. *Microorganisms*  
779 10(6) doi:10.3390/microorganisms10061249
- 780 Xiong, YI, Zhao, Y, Ni, K, Shi, YUE, Xu, Q (2020) Characterization of Ligninolytic Bacteria and  
781 Analysis of Alkali-Lignin Biodegradation Products. *Polish J Microbiol* 69(3):339-347  
782 doi:10.33073/pjm-2020-037
- 783 Zhang, F, Li, L, Sun, M, Hu, C, Zhang, Z, Liu, Z, Shao, H, Xi, G, Pan, J (2019) Fungal Community  
784 Analyses of a Pirogue from the Tang Dynasty in the National Maritime Museum of China.  
785 *Appl Sci* 9(19) doi:10.3390/app9194129
- 786 Zhang, W, Ren, X, Lei, Q, Wang, L (2021) Screening and Comparison of Lignin Degradation Microbial  
787 Consortia from Wooden Antiques. *Molecules* 26(10) doi:10.3390/molecules26102862
- 788  
789  
790  
791  
792  
793  
794  
795  
796  
797  
798  
799  
800  
801  
802  
803  
804  
805

806  
807  
808  
809  
810  
811  
812

### 813 **Figures and tables**

#### 814 **Figure 1. Characteristics of the samples**

815 The location of nine ancestral halls and the sampling sites. Sample CHEN\_D1, CHEN\_U1, LIN\_D2,  
816 LIN\_U2, and FU\_2 on wooden thresholds. Sample CHEN\_D2, CHEN\_U2, GUAN\_1, SAN\_3,  
817 LIN\_D1, LIN\_U1, DONG\_3, LIE\_1, and MING\_2 on wooden doors. Sample GUAN\_2 on a wooden  
818 railing. Sample GUAN\_3, QING\_D2, and QING\_U2 on wooden folding screens. Sample SAN\_1 and  
819 SAN\_2 on Wooden beams. Sample LIE\_2 on a wooden table corner. Sample LIE\_3 on a wooden bolt.  
820 Sample DONG\_1, DONG\_2, QING\_D1, and QING\_U1 on wooden pillars. Sample FU\_1 on a  
821 Wooden incense burner. Sample FU\_3 and MING\_3 on shrines. Sample MING\_1 on a sacrificial table.



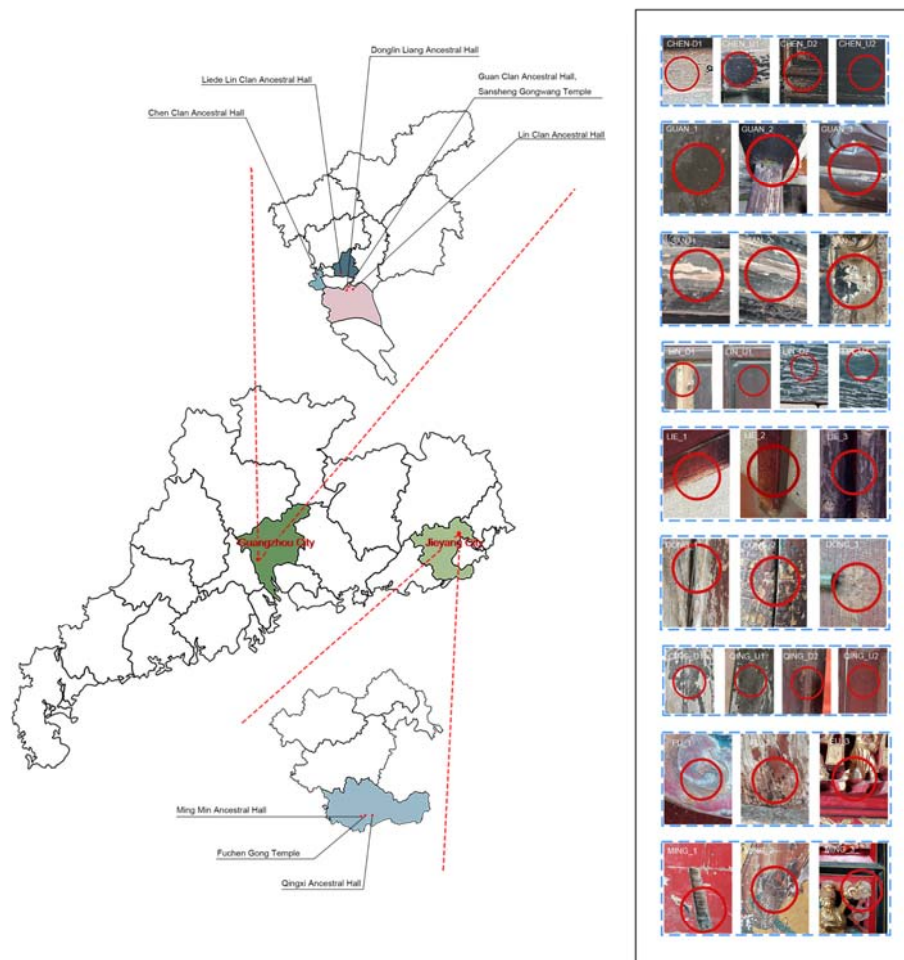

822

823 **Figure 2. Determining the diversity of microbial communities from samples using amplicon**  
824 **sequencing**

825 (a, b, c and d) Percentage of amplicon reads that mapped to each ancestral hall. Phylum level taxonomy  
826 and genera level taxonomy of microbiome on the damaged surfaces of nine ancestral halls in different  
827 visitor flow rates under the same climate condition based on 16S amplicon sequencing and 18S  
828 amplicon sequencing. (a) Bacterial phyla. (b) Fungal phyla. (c) Bacterial genera. (d) Fungal genera.

829 (e and f) Distribution of Genera level taxonomy of microbiome in damaged and undamaged surfaces  
830 among the samples of Urb\_CHEN, Sub\_LIN, and RD\_QING based on 16S amplicon sequencing and  
831 18S amplicon sequencing. (E) Bacterial genera. (F) Fungal genera.

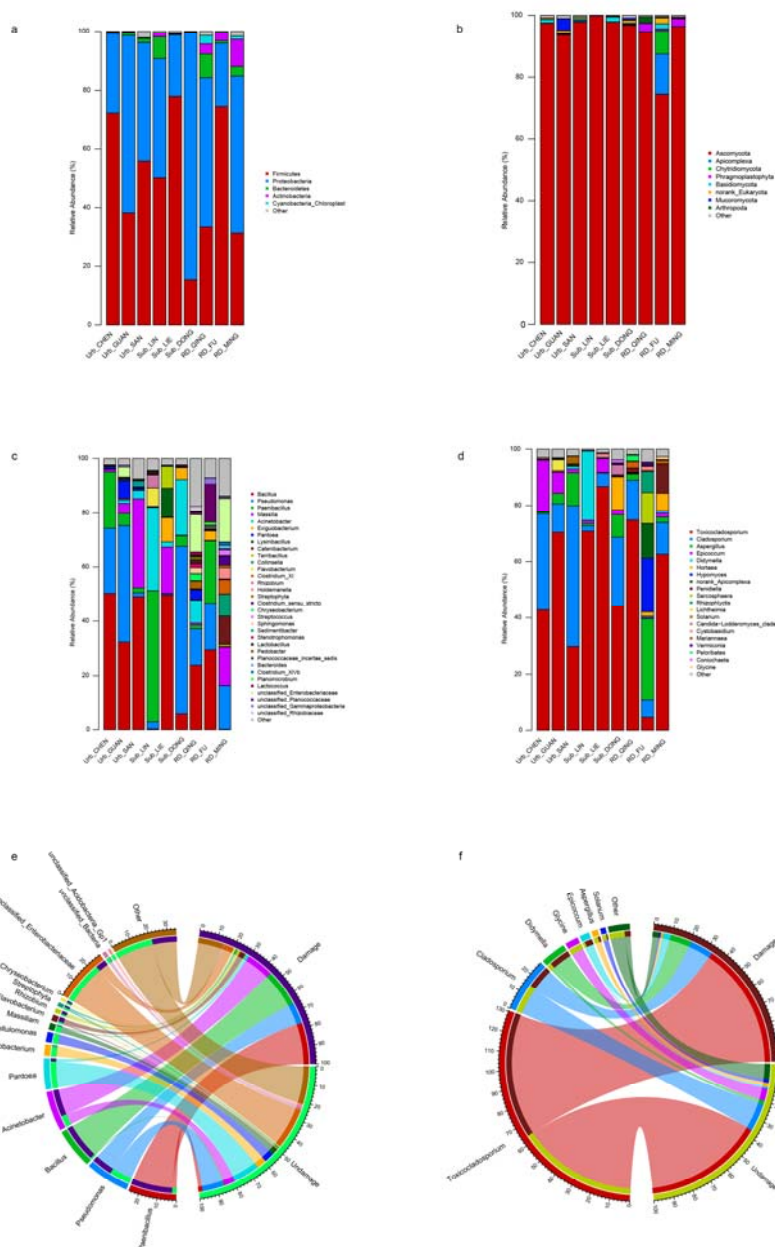

832

833 **Figure 3. Genetic function prediction for the microbial communities based on KEGG**

834 (a) Reconstruction of the cellulose degradation pathways at the microbiome on the surfaces of ancestral  
835 halls based on KEGG Orthology, some of which that marked in red were detected in our study.

836 (b, c and d) The major functions driving geomicrobiological energy metabolism of microbiome  
837 communities on urban (a), sub-urban (b), and rural (c) ancestral halls. Totally five functions are  
838 summarized through KEGG Pathway. All abundances are reported as the percentage of amplicon reads.

839 Vertical lines indicate the standard deviation of three samples, while Urb\_CHEN, Sub\_LIN, and  
840 RD\_QING had four samples and RD\_MING had two samples.

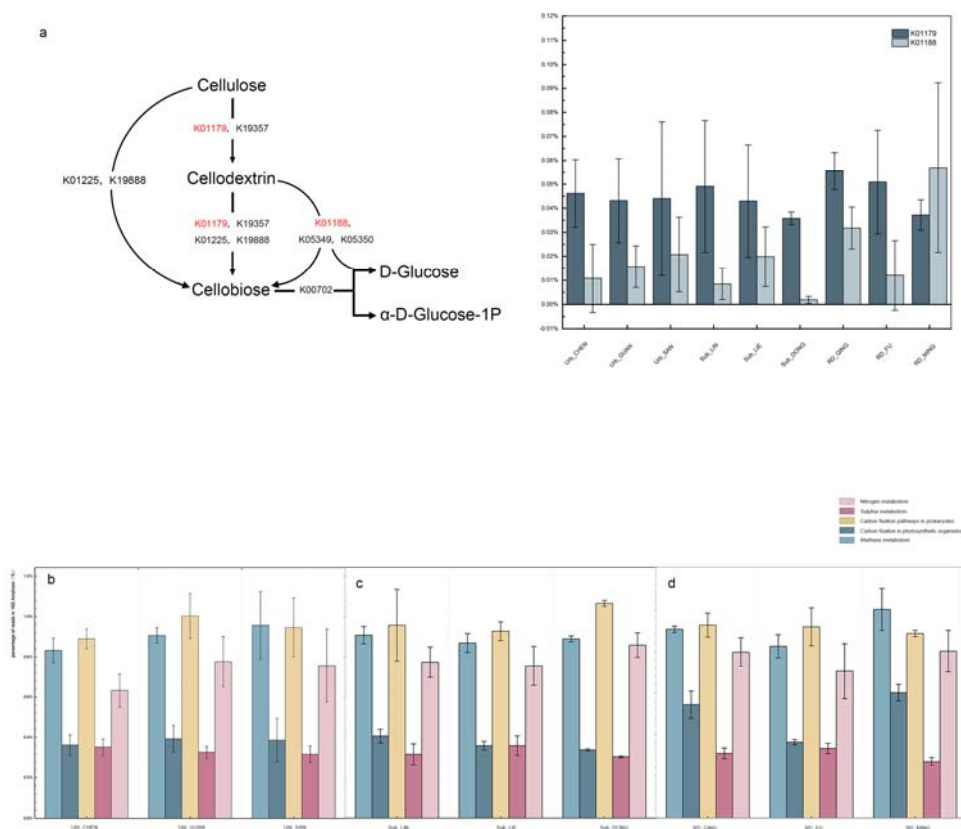

841

842 **Figure 4. Verification of the degrading ability of microorganisms from Urb\_CHEN based on**  
 843 **conventional culturing methods**

844 Bacterial isolates that can use guaiacol on lignin-degrading agar medium and cellulose on  
 845 CMC-degrading agar medium for two days. (a) *Pseudomonas* sp. (b) *Pantoea dispersa* strain. (c)  
 846 *Paenibacillus* sp. (d) *Bacillus cereus* strain. (e) *Priestia megaterium* strain.

847 Bacterial isolates that can only use guaiacol on lignin-degrading agar medium for two days. (F)  
 848 *Curtobacterium* sp.

849 *Microbacterium oleivorans* strain which cannot grow on lignin-degrading agar medium or

850 CMC-degrading agar medium does not be shown.

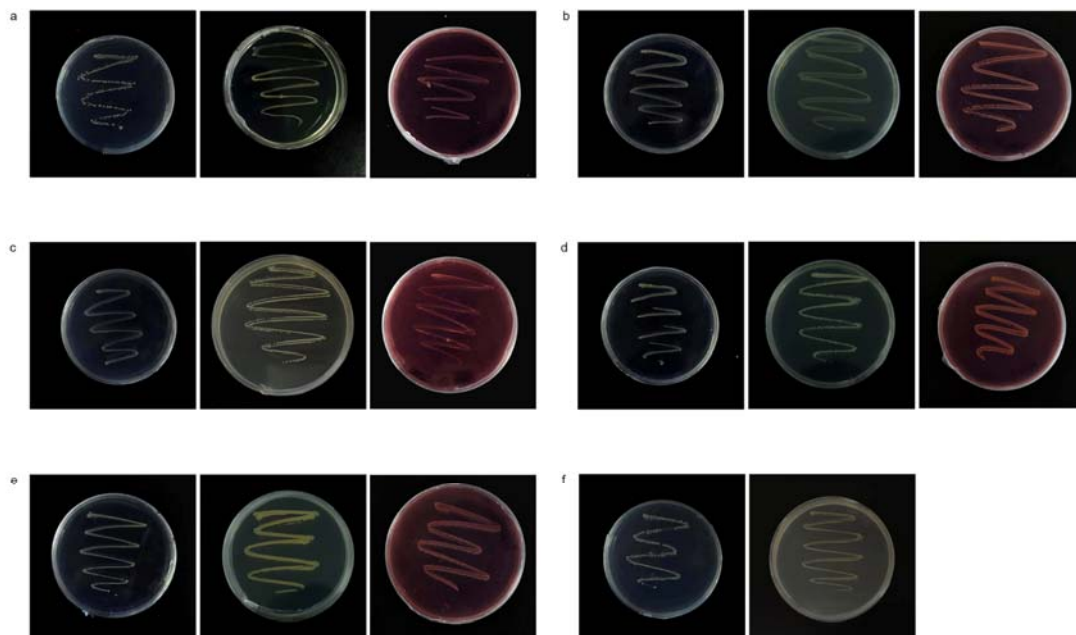

851

852 **Figure 5. Antimicrobial sensitivity test of the microorganisms from Urb\_CHEN**

853 [a] Antimicrobial sensitivity test of the bacterial isolates using agar disk-diffusion method for two days.

854 The disks on each BPM plate were loaded with water, Isothiazolinone at the concentration of 1%(v/v)

855 from left to right. (a) *Pseudomonas* sp. (b) *Pantoea dispersa* strain. (c) *Paenibacillus* sp. (d) *Bacillus*

856 *cereus* strain. (e) *Priestia megaterium* strain. (f) *Curtobacterium* sp. (g) *Microbacterium oleivorans*

857

858 [b] Antimicrobial sensitivity test of the fungal isolates using agar disk-diffusion method for three days.

859 The disks on each PDA plate were loaded with water, Isothiazolinone at the concentration of 1% (v/v),

860 and NaClO at the concentration of 1% (w/v) from left to right. (a) *Rhodotorula mucilaginosa* strain. (b)  
861 *Cystobasidium* sp. (c) *Aureobasidium pullulans* strain. (d) *Cladosporium* sp. (e) *Trichoderma* sp. (f)  
862 *Daldinia* sp. (g) *Aspergillus sydowii* strain.

863 The Red triangles on both (A) and (B) are used for locating partially indistinct disks. Three disks on the  
864 same plates were treated identically and used as a cross-reference.

865 [c and d] Standard curve for the change of Inhibition zone diameter by using Isothiazolinone at the  
866 concentration gradient. Vertical lines indicate standard deviations of three replicate tests for each. (c) A  
867 bacterial community for two days. (d) Fungi community for four days.

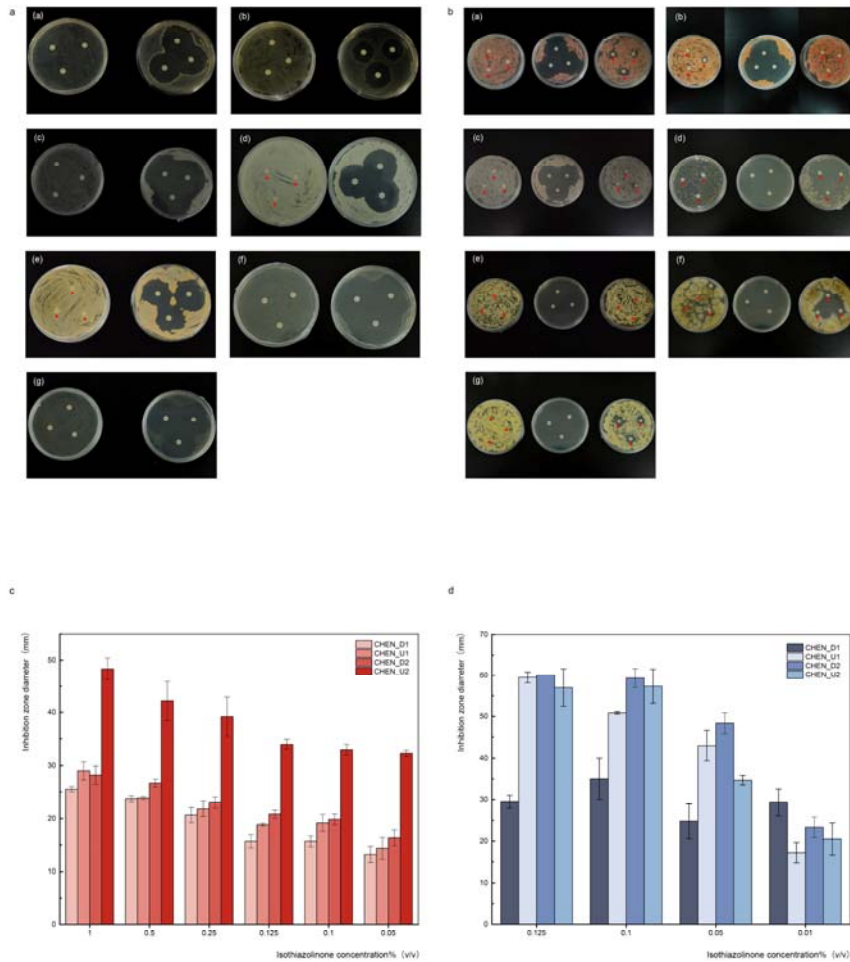

868

869 **Table 1: Abbreviation of the sampling ancestral halls and their samples**

870

| Ancestral hall name      | Label                      | Samples                       |                            |                         |               |                    |
|--------------------------|----------------------------|-------------------------------|----------------------------|-------------------------|---------------|--------------------|
| <b>Urban</b>             |                            |                               |                            |                         |               |                    |
| Chen Clan Ancestral Hall | Urb_CHEN                   | Damaged sites                 | CHEN_D1<br>CHEN_D2         |                         |               |                    |
|                          |                            | Undamaged sites               | CHEN_U1<br>CHEN_U2         |                         |               |                    |
|                          |                            | Damaged sites                 | GUAN_1<br>GUAN_2<br>GUAN_3 |                         |               |                    |
|                          |                            |                               | Damaged sites              | SAN_1<br>SAN_2<br>SAN_3 |               |                    |
| Sansheng Gongwang Temple | Urb_SAN                    | Damaged sites                 |                            |                         |               |                    |
|                          |                            |                               |                            | <b>Sub-urban</b>        |               |                    |
|                          |                            |                               | Lin Clan Ancestral Hall    | Sub_LIN                 | Damaged sites | LIN_D1<br>LIN_D2   |
| Undamaged sites          | LIN_U1<br>LIN_U2           |                               |                            |                         |               |                    |
| Damaged sites            | DONG_1<br>DONG_2<br>DONG_3 |                               |                            |                         |               |                    |
|                          | Damaged sites              | LIE_1<br>LIE_2<br>LIE_3       |                            |                         |               |                    |
|                          |                            | Liede Lin Clan Ancestral Hall | Sub_LIE                    | Damaged sites           |               |                    |
| <b>Rural district</b>    |                            |                               |                            |                         |               |                    |
| Qingxi Ancestral Hall    | RD_QING                    |                               |                            |                         | Damaged sites | QING_D1<br>QING_D2 |
|                          |                            | Undamaged sites               | QING_U1<br>QING_U2         |                         |               |                    |
|                          |                            | Damaged sites                 | MING_1<br>MING_2<br>MING_3 |                         |               |                    |
|                          |                            |                               | Fuchen Gong Temple         | RD_FU                   | Damaged sites |                    |
| FU_1<br>FU_2<br>FU_3     |                            |                               |                            |                         |               |                    |

871

872

873

874

875

876

877

878



879 **Table 2: Molecular identification of strains isolated from the four samples of Urb\_CHEN**

| Nucleotide Blast reference strains |                                         |                  |                |                |
|------------------------------------|-----------------------------------------|------------------|----------------|----------------|
|                                    | Clust relative strain                   | Accession number | Phylum         | Similarity (%) |
| <b>Bacteria</b>                    |                                         |                  |                |                |
| CHEN_B1                            | <i>Pseudomonas</i> sp.                  | MN043751.1       | Proteobacteria | 99.79%         |
| CHEN_B2                            | <i>Pantoea dispersa</i> strain          | MT921704.1       | Proteobacteria | 99.86%         |
| CHEN_B3                            | <i>Paenibacillus</i> sp.                | JF768727.1       | firmicutes     | 99.72%         |
| CHEN_B4                            | <i>Bacillus cereus</i> strain           | MN691548.1       | Firmicutes     | 98.21%         |
| CHEN_B5                            | <i>Priestia megaterium</i> strain       | MF431767.1       | Firmicutes     | 100.00%        |
| CHEN_B6                            | <i>Staphylococcus hominis</i> strain    | KY992547.1       | Firmicutes     | 100.00%        |
| CHEN_B7                            | <i>Curtobacterium</i> sp.               | MK704290.1       | Actinobacteria | 99.72%         |
| CHEN_B8                            | <i>Microbacterium oleivorans</i> strain | JQ660049.1       | Actinobacteria | 99.65%         |
| <b>Fungi</b>                       |                                         |                  |                |                |
| CHEN_F1                            | <i>Rhodotorula mucilaginosa</i> strain  | ON954707.1       | Basidiomycota  | 99.84%         |
| CHEN_F2                            | <i>Cystobasidium</i> sp.                | AF444619.1       | Basidiomycota  | 99.32%         |
| CHEN_F3                            | <i>Aureobasidium pullulans</i> strain   | KT352844.1       | Ascomycota     | 98.23%         |
| CHEN_F4                            | <i>Cladosporium</i> sp.                 | OK242732.1       | Ascomycota     | 99.82%         |
| CHEN_F5                            | <i>Trichoderma</i> sp.                  | ON248245.1       | Ascomycota     | 99.84%         |
| CHEN_F6                            | <i>Daldinia</i> sp.                     | MK311339.1       | Ascomycota     | 99.83%         |
| CHEN_F7                            | <i>Aspergillus sydowii</i> strain       | OP237096.1       | Ascomycota     | 99.65%         |

880 <sup>a</sup>“CHEN\_B1 ~ CHEN\_B8” and “CHEN\_F1 ~ CHEN\_F7” indicate strains were identified by 16S and  
881 ITS rDNA gene. CHEN\_B2, CHEN\_B4, CHEN\_B5, CHEN\_B6, CHEN\_B8, CHEN\_F1, CHEN\_F3,  
882 and CHEN\_F7 could be annotated to species. Others could only be annotated to the genus.

883

884

885

886

887

888

889

890

891

892

893

894

895

896

897

898

899

900

901

902 **Table 3: Hydrolytic zones of the fungal isolates on CMC-degrading agar medium for three days**

| <b>Fungi</b> | <b>Hydrophytic zones diameter (mm)</b> |
|--------------|----------------------------------------|
| CHEN_F1      | No degradation                         |
| CHEN_F2      | No degradation                         |
| CHEN_F3      | 5.00±0.00                              |
| CHEN_F4      | 8.08±1.18                              |
| CHEN_F5      | 23.67±3.51                             |
| CHEN_F6      | 9.67±0.76                              |
| CHEN_F7      | 5.33±0.58                              |

903 <sup>a</sup> Data are represented as mean ± SEM.

904

905

906

907

908

909

910

911

912

913

914

915

916

917

918

919

920

921

922

923

924

925

926

927

928

929

930

931

932

933

934

935

936

937

938 **Table 4: The inhibition zone shown on the BMP agar medium for bacteria (two days) or PDA**  
 939 **agar medium for fungi (three days) using different biocide: Isothiazolinone at the concentration**  
 940 **of 1% (v/v) and NaClO at the concentration of 1% (w/v). Every plate was placed with three disks**  
 941 **(6-mm diameter) as parallel controls.**

| Isolates | Inhibition zone diameter (mm) |               |
|----------|-------------------------------|---------------|
|          | Isothiazolinone               | NaClO         |
| CHEN_B1  | 33.73±0.76                    | /             |
| CHEN_B2  | 26.00±2.65                    | /             |
| CHEN_B3  | 45.33±1.15                    | /             |
| CHEN_B4  | 35.33±0.58                    | /             |
| CHEN_B5  | 32.00±1.00                    | /             |
| CHEN_B6  | 45.33±0.58                    | /             |
| CHEN_B7  | 42.00±2.00                    | /             |
| CHEN_F1  | 36.00±1.00                    | 14.67±2.02    |
| CHEN_F2  | 23.83±1.04                    | No inhibition |
| CHEN_F3  | 39.33±0.58                    | No inhibition |
| CHEN_F4  | Complete inhibition           | 44.67±2.31    |
| CHEN_F5  | Complete inhibition           | 9.00±1.00     |
| CHEN_F6  | Complete inhibition           | 27.33±1.15    |
| CHEN_F7  | Complete inhibition           | 17.67±2.52    |

942 <sup>a</sup> Data are represented as mean ± SEM.

943 <sup>b</sup> “/” means that the research did not carry out the relative experiments. Under the condition of 1% (w/v)  
 944 concentration, NaClO showed no inhibition effect on the mixed strains; therefore, there is no need to  
 945 test for the bacterial isolates.

946

947

948

949

950

951

952

953

954

955

956

957

958

959

960

961

962

963

964
